# Supplementary material for: Investigations of a Rabbit (Oryctolagus cuniculus) Model of Systemic Lupus Erythematosus (SLE), BAFF and Its Receptors
Source: PLoS One. 2009 Dec 30;4(12):e8494. doi: 10.1371/journal.pone.0008494 (PMC2794537; doi:10.1371/journal.pone.0008494)
Supplement: Table S2 — Summary of FACS data (0.11 MB PDF) [file pone.0008494.s002.pdf]

Table S2 Summary of FACS data\*

| Rabbit          | BAFF         |       |       |             |       |        |                    |       |       |                    |       |       |              |       |       | BR3         |       |       |              |       |       |             |       |       |              |       |       |             |       |       |
|-----------------|--------------|-------|-------|-------------|-------|--------|--------------------|-------|-------|--------------------|-------|-------|--------------|-------|-------|-------------|-------|-------|--------------|-------|-------|-------------|-------|-------|--------------|-------|-------|-------------|-------|-------|
|                 | Total (FACS) |       |       | Total (MFI) |       |        | IgM High+Low(FACS) |       |       | IgM High+Low (MFI) |       |       | CD14+ (FACS) |       |       | CD14+ (MFI) |       |       | Total (FACS) |       |       | Total (MFI) |       |       | CD14+ (FACS) |       |       | CD14+ (MFI) |       |       |
|                 | Pre          | 3rd   | 5th   | Pre         | 3rd   | 5th    | Pre                | 3rd   | 5th   | Pre                | 3rd   | 5th   | Pre          | 3rd   | 5th   | Pre         | 3rd   | 5th   | Pre          | 3rd   | 5th   | Pre         | 3rd   | 5th   | Pre          | 3rd   | 5th   | Pre         | 3rd   | 5th   |
| UA345-5 (GR72)  | 79.46        | 7.14  |       | 41.05       | 4.10  |        | 83.12              | 24.95 |       | 48.26              | 6.1   |       | 62.84        | 0.45  |       | 27.38       | 3.10  |       | 18.11        | 5.00  |       | 12.9        | 4.01  |       | 28.17        | 15.60 |       | 15.90       | 6.43  |       |
| UA269-3 (GR73)  | 89.25        | 24.39 | 64.62 | 52.8        | 5.67  | 18.11  | 93.7               | 32.73 | 90.64 | 57.77              | 7.37  | 30.78 | 80.4         | 0.44  | 93.85 | 43.32       | 4.00  | 31.34 | 24.78        | 2.39  | 34.53 | 16.4        | 3.96  | 7.10  | 21.55        | 5.35  | 30.00 | 12.60       | 4.46  | 6.15  |
| 2YY119-9 (GR76) | 51.8         | 39.47 |       | 12.52       | 3.11  |        | 67.73              | 48.95 |       | 18.94              | 5.5   |       | 22.1         | 44.69 |       | 5.83        | 5.94  |       | 9.96         | 36.08 |       | 7.13        | 11.90 |       | 15.11        | 61.28 |       | 9.12        | 17.70 |       |
| UA269-1 (GR77)  | 65.42        | 68.69 | 51.10 | 18.60       | 11.34 | 4.30   | 72.65              | 71.63 | 70.89 | 20.54              | 12.8  | 6.61  | 33.74        | 46.03 | 61.35 | 7.37        | 6.40  | 4.70  | 11.34        | 38.14 | 50.75 | 7.26        | 13.30 | 4.85  | 24.82        | 74.08 | 69.67 | 10.80       | 21.6  | 5.60  |
| XA345-1 (GR80)  | 81.73        | 71.61 | 69.30 | 49.60       | 22.00 | 73.20  | 93.69              | 92.99 | 85.86 | 62                 | 32.7  | 22.4  | 98.66        | 97.02 | 95.07 | 101.0       | 26.60 | 34.10 | 84.33        | 49.43 | 59.46 | 58.2        | 7.48  | 115.0 | 99.01        | 65.74 | 91.5  | 95.30       | 7.36  | 53.90 |
| 2UA14-2 (GR81)  | 85.8         | 68.89 | 69.03 | 44.50       | 19.20 | 66.10  | 94.99              | 86.53 | 84.48 | 51.7               | 25.2  | 19.8  | 98.79        | 94.01 | 91.61 | 96.80       | 19.60 | 31.50 | 81.71        | 39.41 | 61.53 | 50.7        | 6.73  | 105.0 | 97.89        | 69.51 | 82.18 | 71.70       | 8.61  | 46.30 |
| XA234-6 (GR84)  | 90.45        | 89.81 | 71.33 | 381.0       | 61.40 | 75.60  | 96.36              | 95.34 | 84.82 | 182                | 32.8  | 22.1  | 98.59        | 99.24 | 91.68 | 389.0       | 97.20 | 53.40 | 63.52        | 68.68 | 50.81 | 189         | 35.1  | 124.0 | 96.38        | 92.53 | 93.45 | 61.10       | 23.60 | 68.00 |
| XA346-1 (GR85)  | 84.12        | 91.12 | 71.49 | 342.0       | 88.90 | 64.70  | 91.04              | 97.31 | 88.56 | 161                | 46.3  | 27.1  | 96.52        | 99.76 | 89.7  | 534.0       | 93.00 | 45.40 | 79.09        | 68.43 | 82.37 | 127         | 37.7  | 108.0 | 95.01        | 83.79 | 92.76 | 60.70       | 26.70 | 64.30 |
| 6YY328-4 (BB74) | 58.01        | 9.98  |       | 26.66       | 3.34  |        | 81.01              | 15.71 |       | 40.32              | 4.96  |       | 76.87        | 0.33  |       | 38.89       | 3.72  |       | 19.27        | 1.71  |       | 11.90       | 4.25  |       | 1.97         | 3.38  |       | 3.36        | 5.82  |       |
| 2YY125-6 (BB75) | 68.24        | 16.31 | 58.07 | 31.66       | 4.41  | 15.26  | 84.74              | 28.31 | 79.58 | 44.51              | 6.32  | 31.91 | 78.25        | 0.32  | 87.95 | 37.86       | 3.52  | 24.8  | 29.12        | 5.60  | 43.37 | 17.20       | 5.04  | 9.78  | 25.95        | 13.41 | 44.99 | 15.00       | 7.09  | 9.64  |
| YY118-6 (BB78)  | 65.56        | 58.00 |       | 16.70       | 7.70  |        | 75.67              | 74    |       | 19.81              | 10.75 |       | 43.48        | 61.16 |       | 9.60        | 9.14  |       | 13.82        | 42.38 |       | 7.68        | 14.30 |       | 14.49        | 76.68 |       | 8.84        | 21.60 |       |
| 1UA161-2 (BB79) | 39.57        | 56.7  | 44.83 | 8.90        | 7.70  | 3.31   | 47.63              | 77.5  | 69.77 | 10.55              | 13.1  | 6.21  | 38.23        | 64.47 | 76.88 | 8.74        | 9.82  | 6.67  | 11.27        | 35.03 | 61.75 | 8.14        | 12.80 | 5.91  | 7.16         | 40.9  | 75.75 | 7.26        | 13.80 | 6.34  |
| XA346-2 (BB82)  | 82.43        | 64.59 | 66.99 | 49.20       | 21.50 | 82.20  | 96.28              | 92.4  | 90.18 | 65.1               | 33.4  | 24.2  | 97.22        | 83.14 | 78.50 | 76.60       | 15.90 | 22.10 | 86.11        | 50.27 | 60.34 | 50.30       | 9.18  | 97.00 | 99.01        | 55.71 | 53.44 | 70.30       | 6.73  | 30.40 |
| 2UA14-3 (BB83)  | 89.8         | 67.09 | 76.93 | 48.50       | 21.70 | 100.0  | 95.52              | 86.76 | 87.76 | 53.6               | 30.5  | 20.7  | 98.42        | 94.35 | 90.59 | 83.70       | 21.00 | 30.80 | 67.91        | 42.51 | 55.48 | 39.10       | 8.90  | 136.0 | 94.05        | 57.16 | 85.67 | 63.20       | 6.50  | 52.90 |
| XA234-2 (BB86)  | 87.52        | 90.31 | 79.73 | 383.0       | 100.0 | 90.20  | 93.63              | 96.77 | 91.26 | 147                | 37.3  | 28.4  | 97.64        | 99.92 | 91.59 | 450.0       | 86.10 | 51.40 | 71.9         | 44.33 | 65.33 | 123.0       | 43.80 | 130.0 | 95.8         | 74.3  | 92.55 | 70.90       | 23.90 | 70.70 |
| 3XA203-2 (BB87) | 76.83        | 89.20 | 74.61 | 397.0       | 96.20 | 78.50  | 79.11              | 97.34 | 85.76 | 99.1               | 37.2  | 20.1  | 98.19        | 99.76 | 90.12 | 314.0       | 78.60 | 46.70 | 61.38        | 73    | 69.08 | 296.0       | 44.10 | 182.0 | 94.44        | 96.27 | 91.46 | 64.40       | 24.10 | 69.80 |
| 6YY328-3 (CF1)  | 54.29        | 12.68 |       | 23.50       | 3.28  |        | 76.68              | 18.43 |       | 35.55              | 4.37  |       | 84.38        | 0.36  |       | 46.98       | 3.49  |       | 33.21        | 1.17  |       | 18.90       | 3.62  |       | 7.74         | 1.65  |       | 6.70        | 2.95  |       |
| 1UA161-1 (CF2)  | 89.92        | 23.97 | 47.85 | 62.08       | 2.94  | 10.94  | 95.05              | 51.06 | 93.15 | 66.71              | 10.9  | 34.29 | 69.18        | 0.30  | 84.08 | 32.20       | 2.67  | 21.87 | 26.43        | 0.70  | 38.69 | 15.90       | 4.37  | 7.48  | 11.84        | 0.54  | 32.2  | 10.10       | 4.41  | 6.25  |
| 1YY125-4 (CF3)  | 36.84        | 70.28 |       | 8.82        | 10.46 |        | 41.05              | 79.19 |       | 9.22               | 12.19 |       | 25.3         | 53.83 |       | 5.42        | 7.43  |       | 7.32         | 35.34 |       | 6.58        | 12.80 |       | 17.32        | 78.23 |       | 9.33        | 27.10 |       |
| 2YY125-4 (CF4)  | 50.78        | 73.62 | 63.29 | 11.76       | 10.65 | 5.57   | 57.67              | 76.93 | 79.08 | 12.86              | 11.14 | 7.23  | 16.3         | 72.41 | 56.79 | 4.87        | 11.14 | 4.70  | 5.44         | 33.3  | 55.94 | 5.66        | 12.00 | 6.44  | 19.73        | 91.79 | 98.68 | 10.20       | 27.60 | 12.10 |
| XA345-2 (CF5)   | 81.69        | 62.75 | 67.01 | 51.60       | 15.80 | 90.30  | 94.19              | 87.64 | 86.76 | 65.6               | 25.2  | 21.7  | 98.97        | 98.14 | 93.58 | 88.50       | 24.70 | 31.80 | 67.69        | 35.12 | 54.62 | 38.8        | 5.65  | 118   | 98.05        | 85.26 | 95.02 | 67.90       | 12.00 | 66.40 |
| 2XA344-2 (CF6)  | 82.16        | 86.19 | 73.80 | 413.0       | 82.40 | 101.0  | 88.42              | 93.54 | 84.25 | 109                | 32.3  | 24.8  | 99.3         | 99.69 | 81.40 | 260.0       | 67.00 | 37.50 | 46.66        | 63.9  | 57.26 | 332         | 37.5  | 141   | 91.86        | 91.17 | 91.06 | 56.30       | 20.80 | 64.30 |
| 1XA344-1 (CF7)  | 85.4         | 88.77 | 68.60 | 377.0       | 72.00 | 73.80/ | 91.86              | 96.94 | 89.01 | 143                | 30.6  | 22    | 97.78        | 99.72 | 93.12 | 425.0       | 79.10 | 54.50 | 66.12        | 72.69 | 72.39 | 215         | 40.3  | 159   | 93.58        | 89.53 | 94.82 | 56.80       | 17.10 | 86.10 |

Table S2 Summary of FACS data (continued)

| Rabbit          | TAC1         |       |       |             |       |       |                     |       |       |                    |      |       |              |       |       |             |       |       |  |  |  |  |  |  |  |  |  |
|-----------------|--------------|-------|-------|-------------|-------|-------|---------------------|-------|-------|--------------------|------|-------|--------------|-------|-------|-------------|-------|-------|--|--|--|--|--|--|--|--|--|
|                 | Total (FACS) |       |       | Total (MFI) |       |       | IgM High+Low (FACS) |       |       | IgM High+Low (MFI) |      |       | CD14+ (FACS) |       |       | CD14+ (MFI) |       |       |  |  |  |  |  |  |  |  |  |
|                 | Pre          | 3rd   | 5th   | Pre         | 3rd   | 5th   | Pre                 | 3rd   | 5th   | Pre                | 3rd  | 5th   | Pre          | 3rd   | 5th   | Pre         | 3rd   | 5th   |  |  |  |  |  |  |  |  |  |
| UA345-5 (GR72)  | 34.94        | 17.58 |       | 14.86       | 4.22  |       | 30.61               | 24.63 |       | 11.97              | 5.78 |       | 57.22        | 13.69 |       | 25.25       | 4.30  |       |  |  |  |  |  |  |  |  |  |
| UA269-3 (GR73)  | 26.23        | 20.86 | 63.52 | 11.24       | 4.91  | 16.55 | 21.39               | 25.52 | 73.09 | 10                 | 6.21 | 20.35 | 61.87        | 11.82 | 57.10 | 30.23       | 3.46  | 12.19 |  |  |  |  |  |  |  |  |  |
| 2YY119-9 (GR76) | 29.43        | 12.41 |       | 7.40        | 1.45  |       | 23.1                | 15.83 |       | 7.43               | 1.67 |       | 11.81        | 8.60  |       | 4.00        | 1.00  |       |  |  |  |  |  |  |  |  |  |
| UA269-1 (GR77)  | 26.3         | 12.12 | 34.20 | 5.73        | 1.2   | 2.44  | 23.27               | 11.95 | 37.35 | 7.4                | 1.19 | 2.55  | 20.57        | 7.17  | 27.19 | 4.78        | 1.00  | 1.65  |  |  |  |  |  |  |  |  |  |
| XA345-1 (GR80)  | 64.13        | 39.70 | 38.17 | 30.8        | 8.98  | 76.7  | 65.92               | 39.18 | 34.57 | 31.1               | 8.86 | 9.74  | 93.29        | 78.54 | 87.97 | 54.00       | 12.40 | 29.60 |  |  |  |  |  |  |  |  |  |
| 2UA14-2 (GR81)  | 68.95        | 34.48 | 41.14 | 34.3        | 8.67  | 82.6  | 70.03               | 40.58 | 36.71 | 33.3               | 10   | 9.35  | 87.84        | 66.58 | 66.12 | 43.20       | 10.70 | 19.30 |  |  |  |  |  |  |  |  |  |
| XA234-6 (GR84)  | 30.24        | 7.40  | 7.08  | 223         | 46.2  | 36.7  | 24.56               | 7.322 | 6.655 | 30                 | 4.44 | 5.3   | 81.62        | 3.44  | 7.29  | 43.00       | 6.57  | 7.77  |  |  |  |  |  |  |  |  |  |
| XA346-1 (GR85)  | 31.13        | 7.77  | 8.00  | 219         | 28.3  | 39.5  | 24.65               | 9.173 | 9.522 | 31.5               | 5.09 | 5.92  | 67.82        | 0.75  | 2.97  | 34.20       | 3.70  | 5.34  |  |  |  |  |  |  |  |  |  |
| 6YY328-4 (BB74) | 40.02        | 11.10 |       | 16.55       | 3.5   |       | 32.92               | 15.7  |       | 12.98              | 4.26 |       | 62.75        | 6.83  |       | 28.64       | 2.94  |       |  |  |  |  |  |  |  |  |  |
| 2YY125-6 (BB75) | 33.94        | 12.51 | 42.40 | 14.2        | 3.96  | 10.46 | 28.75               | 22.12 | 38.68 | 11.65              | 5.83 | 6.49  | 80.60        | 12.49 | 60.10 | 40.68       | 3.34  | 12.63 |  |  |  |  |  |  |  |  |  |
| YY118-6 (BB78)  | 30.3         | 16.54 |       | 6.92        | 1.64  |       | 25.67               | 18.23 |       | 7.77               | 1.67 | 9.47  | 14.83        | 7.86  |       | 3.60        | 1.00  |       |  |  |  |  |  |  |  |  |  |
| 1UA161-2 (BB79) | 37.45        | 12.70 | 31.15 | 6.67        | 1.31  | 2.19  | 29.3                | 14.7  | 25.46 | 9.47               | 1.23 | 1.9   | 26.47        | 6.29  | 29.16 | 5.94        | 1.00  | 1.85  |  |  |  |  |  |  |  |  |  |
| XA346-2 (BB82)  | 64.96        | 25.42 | 31.08 | 35.8        | 7.26  | 74.4  | 59.76               | 28.69 | 26.63 | 32.3               | 8.34 | 8.26  | 83.58        | 48.18 | 58.52 | 45.20       | 7.70  | 17.30 |  |  |  |  |  |  |  |  |  |
| 2UA14-3 (BB83)  | 69.47        | 29.58 | 40.96 | 34          | 7.56  | 107   | 70.39               | 32.19 | 36.7  | 31                 | 8.4  | 11.4  | 91.08        | 72.91 | 81.69 | 51.40       | 11.10 | 25.40 |  |  |  |  |  |  |  |  |  |
| XA234-2 (BB86)  | 23.43        | 6.82  | 6.54  | 79.1        | 52.9  | 90.5  | 19.89               | 7.002 | 7.019 | 33.4               | 4.51 | 5.36  | 82.86        | 3.27  | 6.84  | 51.70       | 5.98  | 6.95  |  |  |  |  |  |  |  |  |  |
| 3XA203-2 (BB87) | 32.33        | 5.18  | 5.57  | 438         | 55.1  | 53.7  | 29.07               | 5.823 | 5.643 | 35.9               | 4.56 | 5.08  | 71.23        | 1.69  | 5.74  | 36.60       | 4.66  | 6.39  |  |  |  |  |  |  |  |  |  |
| 6YY328-3 (CF1)  | 35.63        | 16.49 |       | 13.46       | 2.86  |       | 33.13               | 32.55 |       | 12.75              | 6.98 |       | 89.30        | 9.27  |       | 60.98       | 2.94  |       |  |  |  |  |  |  |  |  |  |
| 1UA161-1 (CF2)  | 45.95        | 16.50 | 52.42 | 19.28       | 2.79  | 12.3  | 35.17               | 32.96 | 57.83 | 14.86              | 7.4  | 13.95 | 67.94        | 3.42  | 54.92 | 33.68       | 2.31  | 11.44 |  |  |  |  |  |  |  |  |  |
| 1YY125-4 (CF3)  | 30.6         | 11.85 |       | 4.91        | 1.60  |       | 25.3                | 12.63 |       | 6.15               | 1    |       | 10.24        | 14.82 |       | 3.00        | 1.24  |       |  |  |  |  |  |  |  |  |  |
| 2YY125-4 (CF4)  | 32.44        | 17.11 | 35.72 | 7.17        | 1.84  | 2.64  | 30.56               | 16.32 | 37.79 | 9.14               | 1.61 | 2.84  | 45.06        | 17.65 | 58.68 | 10.00       | 1.46  | 4.37  |  |  |  |  |  |  |  |  |  |
| XA345-2 (CF5)   | 58.87        | 35.95 | 46.81 | 27.2        | 8.75  | 106.0 | 57.51               | 55.56 | 40    | 24.7               | 11.6 | 10.3  | 93.74        | 85.81 | 85.95 | 58.70       | 16.00 | 28.70 |  |  |  |  |  |  |  |  |  |
| 2XA344-2 (CF6)  | 31.64        | 4.44  | 6.46  | 419         | 59.10 | 57.30 | 33.26               | 5.246 | 7.147 | 39                 | 3.95 | 5.74  | 57.67        | 1.51  | 5.62  | 26.90       | 5.23  | 6.41  |  |  |  |  |  |  |  |  |  |
| 1XA344-1 (CF7)  | 31.57        | 6.44  | 7.02  | 262         | 59.10 | 52.10 | 26.97               | 7.133 | 7.618 | 32.5               | 4.65 | 6.04  | 68.57        | 1.67  | 3.93  | 36.20       | 5.14  | 6.30  |  |  |  |  |  |  |  |  |  |
